# Supplementary material for: Preparation of highly interconnected porous polymer microbeadsviasuspension polymerization of high internal phase emulsions for fast removal of oil spillage from aqueous environments
Source: Royal Society of Chemistry journal article supplement (doi:10.1039/c9ra05220h), 2019-01-01
Supplement: c9ra05220h1.pdf [file c9ra05220h1.pdf]

## Preparation of highly interconnected porous polymer microbeads *via* suspension polymerization of high internal phase emulsions for fast removal of oil spillage from aqueous environment

Xiaoling Cui,<sup>a</sup> Hong Shao,<sup>a</sup> Yuanrui Song,<sup>a</sup> Song Yang,<sup>b</sup> Fengwei Wang,<sup>c</sup> and Huarong Liu\*<sup>a</sup>

<sup>a</sup> CAS Key Laboratory of Soft Matter Chemistry, Department of Polymer Science and Engineering, University of Science and Technology of China, Hefei, Anhui 230026, P. R. China

<sup>b</sup> Key Laboratory of Tobacco Chemistry, Zhengzhou Tobacco Research Institute of CNTC, Zhengzhou, Henan 450001, P. R. China

<sup>c</sup> Department of Electronic Packaging Technology School of Materials Science and Technology, Jiangsu University of Science and Technology, Zhenjiang, Jiangsu, 212003, P.R. China

### Gel fraction

The 2-m-80% sample of P(BA-SMA-St-DVB) polyHIPE monolith was extracted in a Soxhlet apparatus by different good solvents for 24 h, and then dried in a vacuum oven at 50 °C to constant weight. The gel fraction can be calculated by the following formula (1):

$$\text{Gel fraction (\%)} = \frac{W_1}{W_0} \times 100\% \quad (1)$$

where  $W_0$  is the original weight of 2-m-80% sample,  $W_1$  is the the weight of 2-m-80% sample after extraction by good solvents.

**Table S1** Gel fraction of 2-m-80% sample extracted by different good solvents

|              | Good solvents  |         |                 |         |
|--------------|----------------|---------|-----------------|---------|
|              | Dichloroethane | Toluene | Tetrahydrofuran | Acetone |
| Gel fraction | 99.0           | 99.3    | 99.2            | 99.6    |

### Preparation of P(St-BA-SMA) monolith without the crosslinking agent

As a control experiment, P(St-BA-SMA) monolith was prepared according to the same procedure as the 2-m-80% sample except that 0.5 g of DVB was replaced by 0.5 g of styrene.

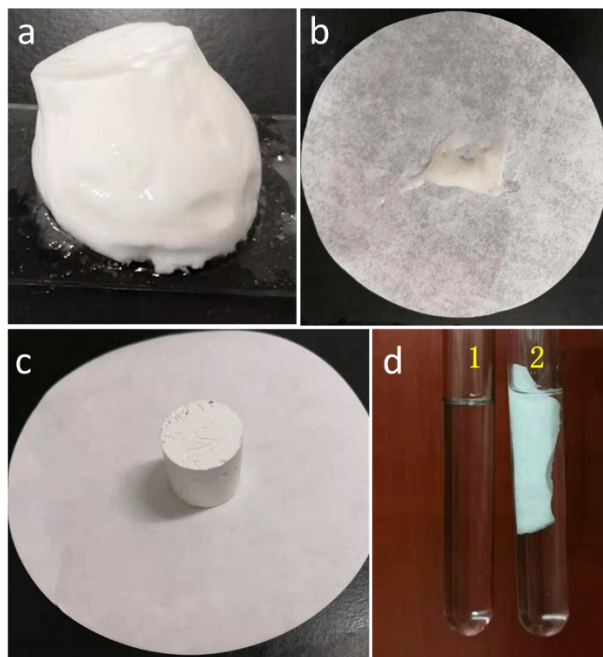

**Figure S1.** Digital photos: (a) The sample of P(St-BA-SMA) without post-treatment after polymerization; (b) The sample of P(St-BA-SMA) after extraction with ethanol; (c) The 2-m-80% sample of P(BA-SMA-St-DVB) after extraction with ethanol; (d) The sample of P(St-BA-SMA) fully soluble in dichloroethane (1) and the 2-m-80% sample insoluble in dichloroethane (2).
